# Supplementary material for: The Growth of Earthquake Clusters
Source: Frontiers journal article supplement (doi:10.3389/feart.2021.638336), 2021-03-17
Supplement: Data_Sheet_1.PDF [file Data_Sheet_1.PDF]

**Electronic supplement to the paper**  
**Growth of earthquake clusters**  
**by**

**Tomas Fischer and Sebastian Hainzl,**  
**Frontiers of Earth Science, 2021**

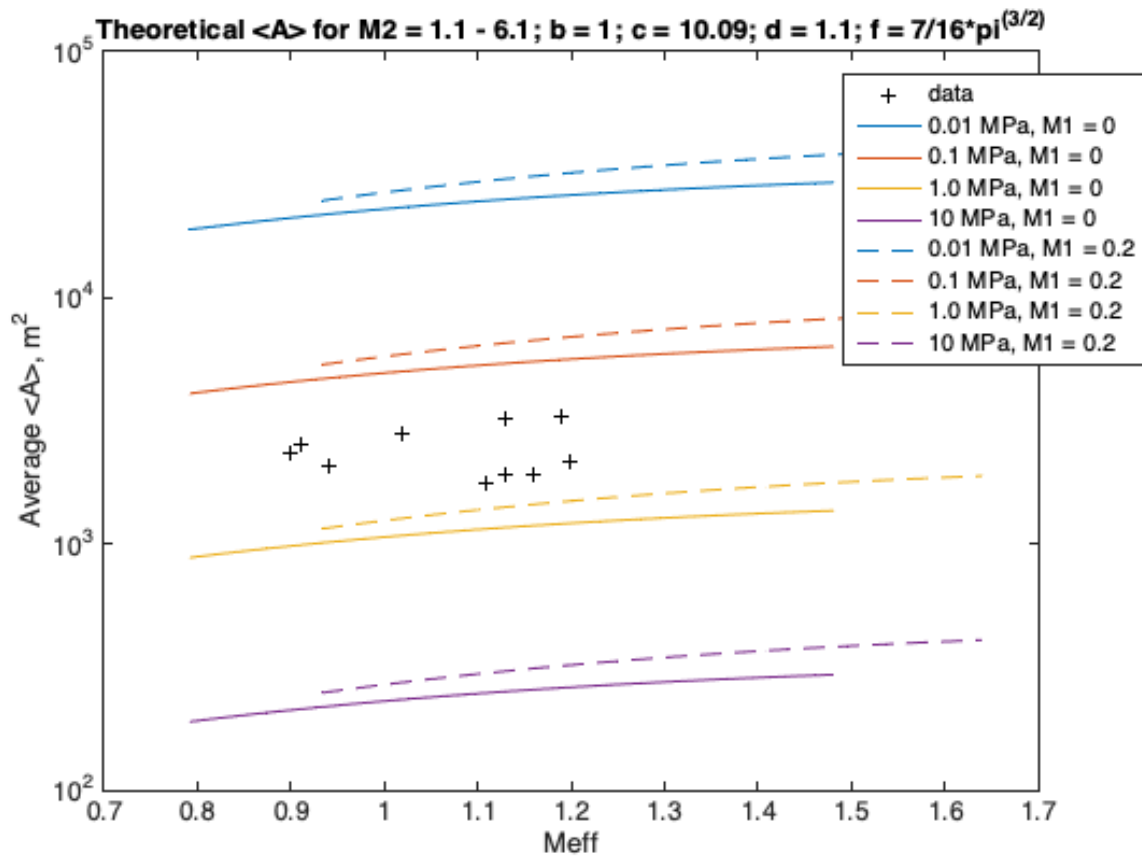

**Figure S1.** Dependence of the theoretical average rupture area  $\langle A \rangle$  (curves) obtained by Eq. (6) on the minimum magnitude  $M_1$ . Full lines show the theoretical average rupture area  $\langle A \rangle$  for  $M_1=0$  and dashed lines for  $M_1=0.2$ . Line color indicates the stress drops of 0.01 MPa (blue), 0.1 MPa (red), 1 MPa (yellow), and 10 MPa (violet). The following constants were used in Eq. (6):  $b = 1.0$ ,  $c = 1.09$ ,  $d = 1.1$  and  $f = 7/16 \pi^{(3/2)}$ .

Crosses indicate the measured average rupture area for Cluster 1 for the extending equidistant windows that included from 10 to 100% of events.

The maximum magnitude  $M_2$  has been increased from 1.1 to 6.1 so that the theoretical effective magnitudes cover the range of measured effective magnitudes. The corresponding effective magnitude  $\langle M_{eff} \rangle$  on the horizontal axis in was obtained by Eqs. (9) and (4).

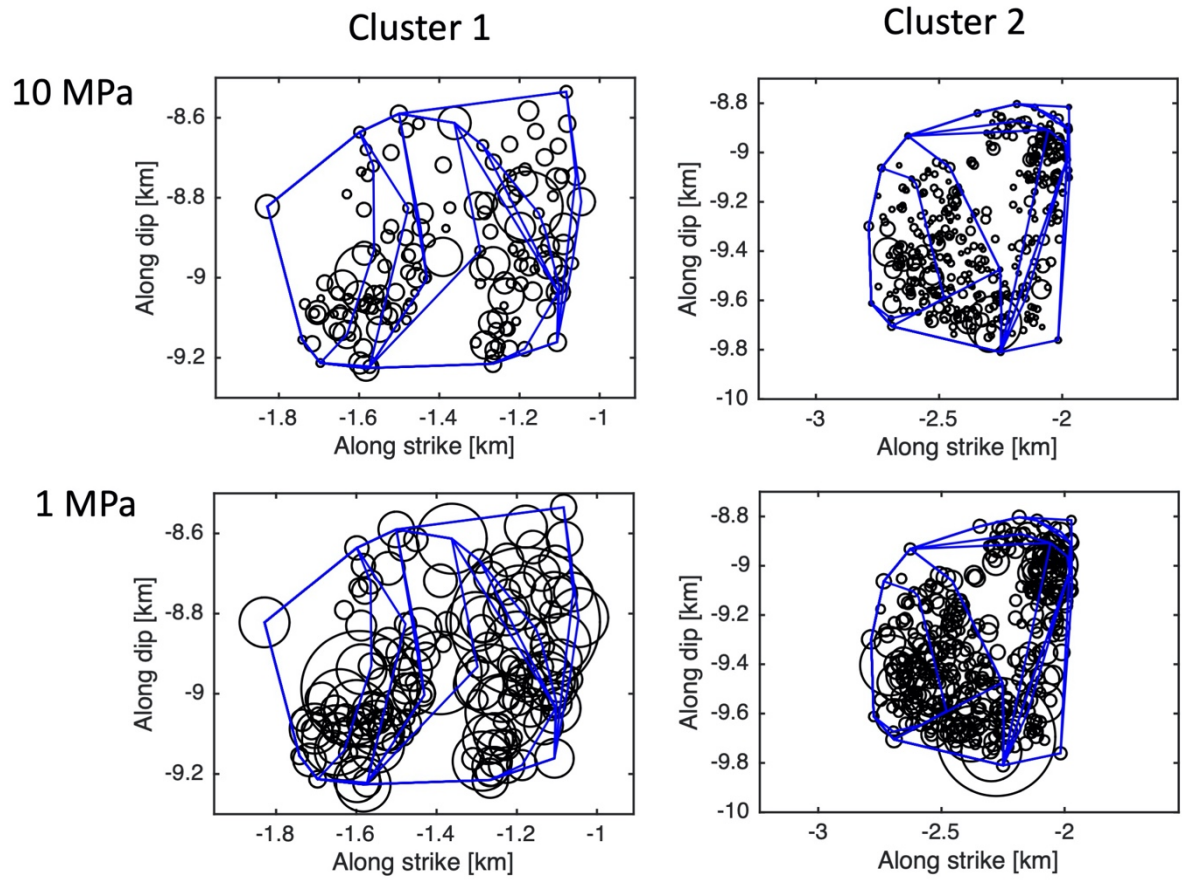

**Figure S2.** Growth of the two analyzed clusters showing the average rupture areas estimated by Eq. (5) considering static stress drop of 10 and 1 MPa.
